# Supplementary material for: Probing ballistic thermal conduction in segmented silicon nanowires
Source: Royal Society of Chemistry journal article supplement (doi:10.1039/c9nr03863a), 2019-01-01
Supplement: c9nr03863a1.pdf [file c9nr03863a1.pdf]

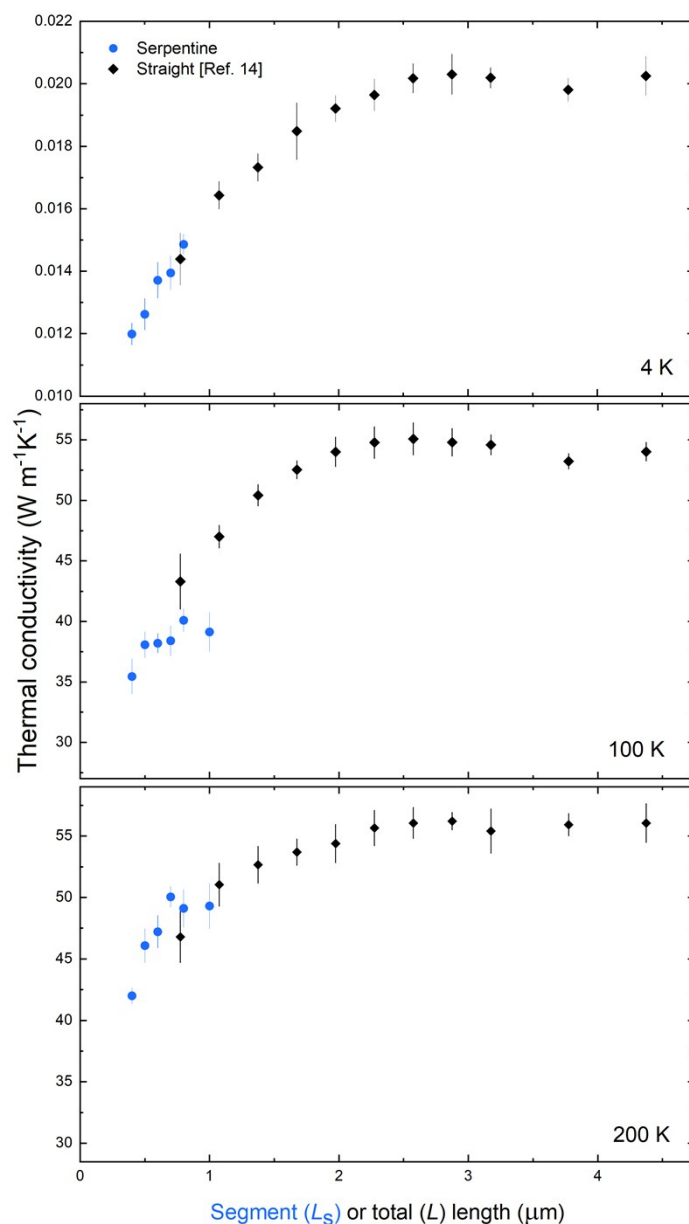

**Fig. S1** Length-dependent thermal conductivity. The thermal conductivity of serpentine NWs and straight NWs from Ref. 14 measured at 4, 100, and 200 K.

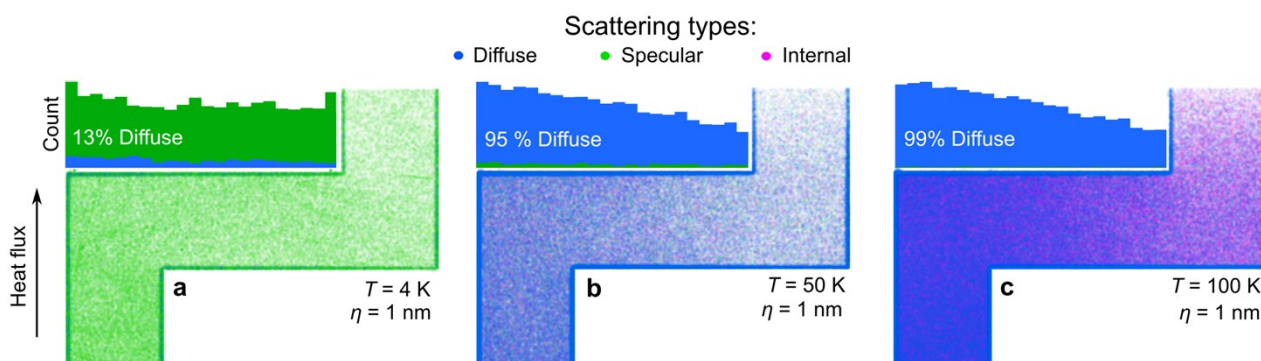

**Fig. S2** Maps of diffuse (blue), specular (green), and internal (red) scattering events at (a) 4 K, (b) 50, and (c) 100 K for the surface roughness of 1 nm show a gradual transition to more diffuse phonon transport as the temperature is increased.

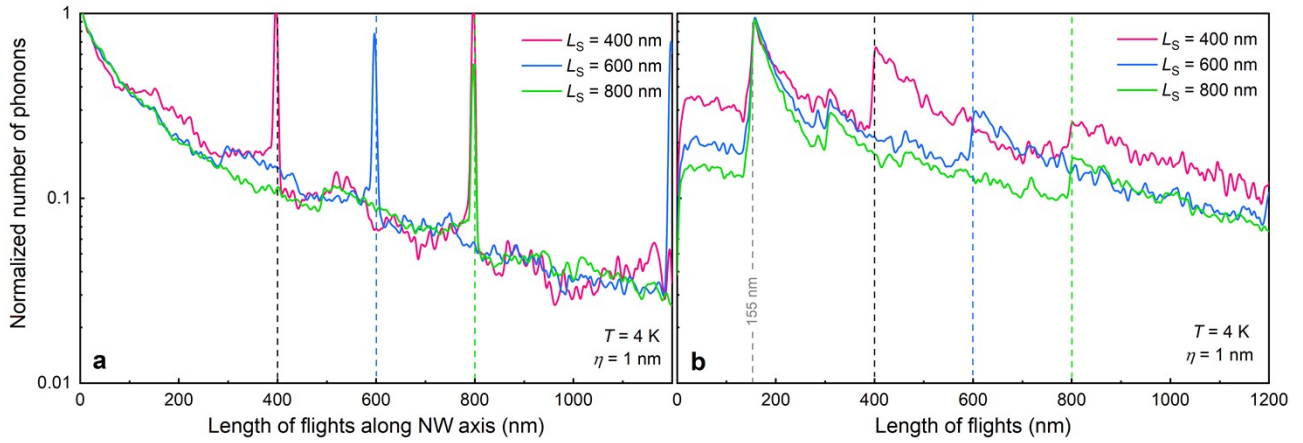

**Fig. S3** (a) Normalised number of phonons as a function of phonon flight lengths (a) projected on NW axis and (b) non-projected. The surface roughness of sidewalls is 1 nm.

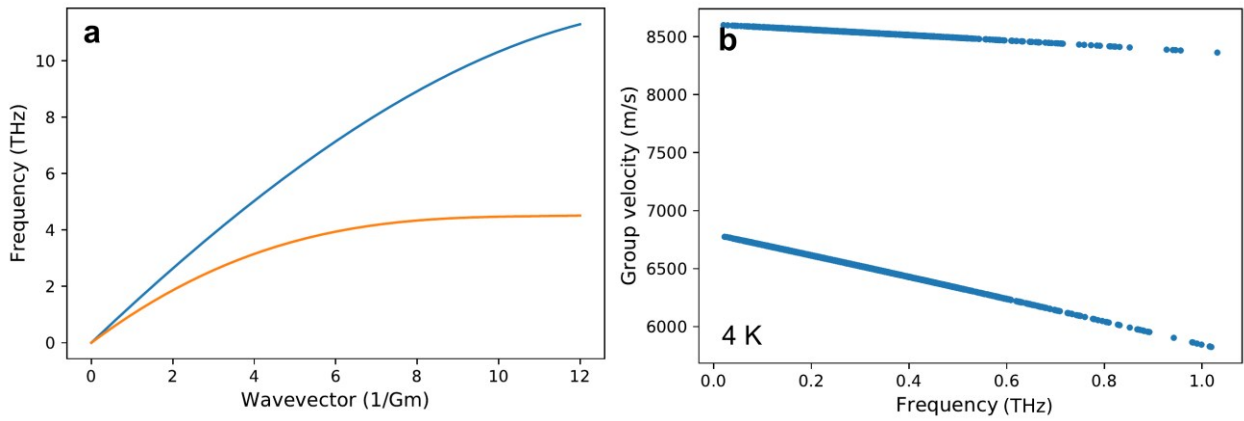

**Fig. S4** (a) Bulk phonon dispersion used for the simulations. (b) Example of phonon group velocities obtained from the dispersion for simulations at 4 K.

**Table S1** Percentage of different scattering events at different temperatures. Blue and green cells show the percentage of diffuse and specular scattering events of the given type, respectively.

| Scattering type  | 4 K    |        | 50 K   |        | 100 K  |        |
|------------------|--------|--------|--------|--------|--------|--------|
| Top & bottom     | 75.44% | 1.54%  | 52.34% | 69.84% | 35.42% | 88.64% |
|                  |        | 98.46% |        | 30.16% |        | 11.36% |
| Side walls       | 23.46% | 37.32% | 33.74% | 98.34% | 22.19% | 99.53% |
|                  |        | 62.68% |        | 1.66%  |        | 0.47%  |
| Internal         | 0%     |        | 11.79% |        | 41%    |        |
| Rethermalization | 1.10%  |        | 2.13%  |        | 1.38%  |        |
